# Supplementary material for: Assessing What Matters to People Affected by Alzheimer’s Disease: A Quantitative Analysis
Source: Springer Nature journal article supplement (doi:10.1007/s40120-023-00445-0), 2023-02-10
Supplement: MOESM1 [file 24015556]

## **Supplementary Material**

### **Assessing What Matters to People Affected by Alzheimer's Disease: A Quantitative Analysis**

Brett Hauber, PhD<sup>1\*</sup>; Russ Paulsen, MA<sup>2</sup>; Holly B. Krasa, MS<sup>3</sup>; George Vradenburg, JD<sup>2</sup>; Meryl Comer, BS<sup>2</sup>; Leigh F Callahan, PhD<sup>4</sup>; John Winfield, MD<sup>4\*\*\*</sup>; Michele Potashman, PhD<sup>5</sup>; Ann Hartry, PhD<sup>6\*</sup>; Daniel Lee, MD<sup>7</sup>; Hilary Wilson, PhD<sup>8</sup>; Deborah L. Hoffman, PhD<sup>9</sup>; Dan Wieberg, BA<sup>10</sup>; Ian N. Kremer, JD<sup>11</sup>; Geraldine A. Taylor, MPH<sup>12</sup>; James M Taylor, MBA<sup>13</sup>; Debra Lappin, JD<sup>14</sup>; Allison D. Martin, MS<sup>14\*</sup>; Terry Frangiosa, MBA<sup>2</sup>; Virginia Biggar<sup>2</sup>; Christina Slota, PhD, RN<sup>1</sup>; Carla Romano, MS<sup>1</sup>; Dana B. DiBenedetti, PhD<sup>1\*\*</sup>

<sup>1</sup> RTI Health Solutions, Research Triangle Park, NC 27709 USA;

<sup>2</sup> UsAgainstAlzheimer's, Washington, DC 20043 USA;

<sup>3</sup> Blue Persimmon Group LLC, Washington, DC 20016 USA;

<sup>4</sup> University of North Carolina, Chapel Hill, NC 27599 USA;

<sup>5</sup> Biogen Inc., Cambridge, MA 02142 USA;

<sup>6</sup> Lundbeck LLC, Deerfield, IL 60015 USA;

<sup>7</sup> Otsuka Pharmaceutical Development & Commercialization Inc., Princeton, NJ 08540 USA;

<sup>8</sup> Boehringer Ingelheim, Burlington, ON L7L 5H4, Canada;

<sup>9</sup> Takeda Pharmaceuticals, Cambridge, MA 02139 USA;

<sup>10</sup> Home Instead Inc., Omaha, NE 68154 USA;

<sup>11</sup> LEAD Coalition (Leaders Engaged on Alzheimer's Disease), Washington, DC 20043 USA;

<sup>12</sup> Living with AD; Co-Founder of Memory Advocate Peers (MAP), New York, NY 10023 USA;

<sup>13</sup> Care Partner, CEO of Memory Advocates Peers (MAP) New York, NY 10023 USA;

<sup>14</sup> Faegre Drinker Consulting, Washington, DC 20001 USA

\* Affiliation at the time this research was conducted. Brett Hauber is now an employee of Pfizer, Inc. Ann Hartry is now an employee of Eli Lilly and Company. Allison D. Martin is now an employee of Sanofi.

\*\* Corresponding author.

\*\*\* Deceased (2022).

**Corresponding Author:**

Dana B. DiBenedetti, PhD

RTI Health Solutions

3040 Cornwallis Road

PO Box 12194

Research Triangle Park, NC 27709-2194 USA

Phone: +1-919-316-3764

Email: ddibenedetti@rti.org

**Table S1. Background Characteristics of Patient Respondents Groups**

| <b>Background Question</b>                                                                                          | <b>Group 1<br/>(n = 54)</b> | <b>Group 2<br/>(n = 51)</b> | <b>Group 3<br/>(n = 50)</b> |
|---------------------------------------------------------------------------------------------------------------------|-----------------------------|-----------------------------|-----------------------------|
| <b>Concerned about problem with memory or thinking, n (%)</b>                                                       |                             |                             |                             |
| Yes                                                                                                                 | 31 (57.4)                   | 45 (88.2)                   | 45 (90.0)                   |
| No                                                                                                                  | 9 (16.7)                    | 3 (5.9)                     | 3 (6.0)                     |
| Don't know or not sure                                                                                              | 14 (25.9)                   | 3 (5.9)                     | 2 (4.0)                     |
| <b>If concerned, discussed concern with doctor, n (%)</b>                                                           |                             |                             |                             |
| n                                                                                                                   | 31                          | 45                          | 45                          |
| Yes                                                                                                                 | 27 (87.1)                   | 43 (95.6)                   | 43 (95.6)                   |
| No                                                                                                                  | 4 (12.9)                    | 2 (4.4)                     | 2 (4.4)                     |
| <b>If discussed with doctor, how long ago, n (%)</b>                                                                |                             |                             |                             |
| n                                                                                                                   | 27                          | 43                          | 43                          |
| 1 year ago, or less                                                                                                 | 10 (37.0)                   | 16 (37.2)                   | 18 (41.9)                   |
| More than 1 year ago, but less than 2 years ago                                                                     | 10 (37.0)                   | 17 (39.5)                   | 10 (23.3)                   |
| More than 2 years ago, but less than 3 years ago                                                                    | 4 (14.8)                    | 8 (18.6)                    | 10 (23.3)                   |
| More than 3 years ago                                                                                               | 3 (11.1)                    | 2 (4.7)                     | 5 (11.6)                    |
| <b>Patient-reported physician diagnoses of health conditions that affect memory and thinking, n (%)<sup>a</sup></b> |                             |                             |                             |
| Normal aging                                                                                                        | 15 (27.8)                   | 9 (17.6)                    | 11 (22.0)                   |
| Age-related memory loss                                                                                             | 15 (27.8)                   | 23 (45.1)                   | 20 (40.0)                   |
| Dementia                                                                                                            | 11 (20.4)                   | 13 (25.5)                   | 15 (30.0)                   |
| Mild cognitive impairment (MCI)                                                                                     | 5 (9.3)                     | 14 (27.5)                   | 7 (14.0)                    |
| Alzheimer's disease                                                                                                 | 13 (24.1)                   | 17 (33.3)                   | 30 (60.0)                   |
| None of the above                                                                                                   | 13 (24.1)                   | 2 (3.9)                     | 2 (4.0)                     |

| <b>Background Question</b>                                                                                                         | <b>Group 1<br/>(n = 54)</b> | <b>Group 2<br/>(n = 51)</b> | <b>Group 3<br/>(n = 50)</b> |
|------------------------------------------------------------------------------------------------------------------------------------|-----------------------------|-----------------------------|-----------------------------|
| <b>Cognitive symptoms in the last month, n (%)<sup>a</sup></b>                                                                     |                             |                             |                             |
| Forgetting events, tasks and/or plans, misplacing things                                                                           | 37 (68.5)                   | 37 (72.5)                   | 40 (80.0)                   |
| Getting confused about dates, the time, getting from place to place, and/or where you are                                          | 19 (35.2)                   | 25 (49)                     | 32 (64.0)                   |
| Difficulty planning and organizing things                                                                                          | 13 (24.1)                   | 22 (43.1)                   | 21 (42.0)                   |
| Difficulty following instructions, writing things down, managing finances                                                          | 12 (22.2)                   | 20 (39.2)                   | 24 (48.0)                   |
| Difficulty speaking and understanding others, finding the right words                                                              | 11 (20.4)                   | 15 (29.4)                   | 21 (42.0)                   |
| Difficulty concentrating, thinking clearly, losing your train of thought, and/or making decisions                                  | 25 (46.3)                   | 28 (54.9)                   | 25 (50.0)                   |
| Having strong emotions, moods, and feelings that may change unexpectedly                                                           | 13 (24.1)                   | 9 (17.6)                    | 18 (36.0)                   |
| Losing interest in the things you used to enjoy                                                                                    | 12 (22.2)                   | 19 (37.3)                   | 16 (32.0)                   |
| Doing or saying things without thinking (for example, things that may be embarrassing to yourself or others, or hurtful to others) | 4 (7.4)                     | 6 (11.8)                    | 8 (16.0)                    |
| Having trouble sleeping                                                                                                            | 14 (25.9)                   | 17 (33.3)                   | 22 (44.0)                   |
| Pacing around or doing or saying the same things over and over                                                                     | 5 (9.3)                     | 8 (15.7)                    | 8 (16.0)                    |
| Changes in appetite and/or preferred foods                                                                                         | 6 (11.1)                    | 7 (13.7)                    | 11 (22.0)                   |
| None of the above                                                                                                                  | 5 (9.3)                     | 3 (5.9)                     | 0 (0.0)                     |

| <b>Background Question</b>                                                                                                                | <b>Group 1<br/>(n = 54)</b> | <b>Group 2<br/>(n = 51)</b> | <b>Group 3<br/>(n = 50)</b> |
|-------------------------------------------------------------------------------------------------------------------------------------------|-----------------------------|-----------------------------|-----------------------------|
| <b>Have other people told you they have noticed changes in your memory and thinking, or your ability to do everyday tasks?, n (%)</b>     |                             |                             |                             |
| Yes                                                                                                                                       | 30 (55.6)                   | 43 (84.3)                   | 41 (82.0)                   |
| No                                                                                                                                        | 24 (44.4)                   | 8 (15.7)                    | 9 (18.0)                    |
| <b>Have you ever known anyone (e.g., friend, family member, or co-worker) who has had Alzheimer's disease or dementia?, n<sup>a</sup></b> |                             |                             |                             |
| Yes                                                                                                                                       | 45 (83.3)                   | 35 (68.6)                   | 37 (74.0)                   |
| No                                                                                                                                        | 7 (13.0)                    | 7 (13.7)                    | 10 (20.0)                   |
| Do not know or not sure                                                                                                                   | 2 (3.7)                     | 9 (17.6)                    | 3 (6.0)                     |

<sup>a</sup> Respondents could select more than one response, so total responses may add up to more than 100%.

**Table S2. Background Characteristics of Care Partner Respondent Groups**

| <b>Background Question</b>                                                                                                           | <b>Group 4<br/>(n = 65)</b> | <b>Group 5<br/>(n = 54)</b> |
|--------------------------------------------------------------------------------------------------------------------------------------|-----------------------------|-----------------------------|
| <b>Care recipient diagnoses of health conditions that affect memory and thinking, n (%)<sup>a</sup></b>                              |                             |                             |
| Normal aging                                                                                                                         | 7 (10.8)                    | 10 (18.5)                   |
| Age-related memory loss                                                                                                              | 11 (16.9)                   | 16 (29.6)                   |
| Dementia                                                                                                                             | 37 (56.9)                   | 30 (55.6)                   |
| Mild cognitive impairment (MCI)                                                                                                      | 13 (20.0)                   | 13 (24.1)                   |
| Alzheimer's disease                                                                                                                  | 36 (55.4)                   | 41 (75.9)                   |
| None of the above                                                                                                                    | 0 (0.0)                     | 2 (3.7)                     |
| <b>Cognitive symptoms of the care recipient in the last month (as reported by care partner), n (%)<sup>a</sup></b>                   |                             |                             |
| Forgetting events, tasks and/or plans, misplacing things                                                                             | 60 (92.3)                   | 47 (87.0)                   |
| Getting confused about dates, the time, getting from place to place, and/or where they are                                           | 54 (83.1)                   | 47 (87.0)                   |
| Difficulty planning and organizing things                                                                                            | 42 (64.6)                   | 38 (70.4)                   |
| Difficulty following instructions, writing things down, managing finances                                                            | 48 (73.8)                   | 39 (72.2)                   |
| Difficulty speaking and understanding others, finding the right words                                                                | 24 (36.9)                   | 39 (72.2)                   |
| Difficulty concentrating, thinking clearly, losing their train of thought, and/or making decisions                                   | 44 (67.7)                   | 43 (79.6)                   |
| Having strong emotions, moods, and feelings that may change unexpectedly                                                             | 33 (50.8)                   | 35 (64.8)                   |
| Losing interest in the things they used to enjoy                                                                                     | 35 (53.8)                   | 36 (66.7)                   |
| Doing or saying things without thinking (for example, things that may be embarrassing to themselves or others, or hurtful to others) | 28 (43.1)                   | 35 (64.8)                   |
| Having trouble sleeping                                                                                                              | 18 (27.7)                   | 25 (46.3)                   |

| <b>Background Question</b>                                                  | <b>Group 4<br/>(n = 65)</b> | <b>Group 5<br/>(n = 54)</b> |
|-----------------------------------------------------------------------------|-----------------------------|-----------------------------|
| Pacing around or doing or saying the same things over and over              | 25 (38.5)                   | 33 (61.1)                   |
| Changes in appetite and/or preferred foods                                  | 22 (33.8)                   | 28 (51.9)                   |
| None of the above                                                           | 0 (0.0)                     | 0 (0.0)                     |
| <b>Care recipient relationship to care partner, n (%)</b>                   |                             |                             |
| Spouse/partner                                                              | 19 (29.2)                   | 11 (20.4)                   |
| Parent                                                                      | 33 (50.8)                   | 24 (44.4)                   |
| Another family member                                                       | 9 (13.8)                    | 14 (25.9)                   |
| A friend                                                                    | 3 (4.6)                     | 4 (7.4)                     |
| Missing                                                                     | 1 (1.5)                     | 1 (1.9)                     |
| <b>Total time each week providing direct care for the care recipient, h</b> |                             |                             |
| Mean (SD)                                                                   | 40.3 (37.2)                 | 46.9 (41.6)                 |
| Missing, n (%)                                                              | 1 (1.5)                     | 3 (5.6)                     |

SD = standard deviation.

<sup>a</sup> Respondents could select more than one response, so total responses may add up to more than 100%.
